# Supplementary material
Source: PubMed Central journal article supplement (PMC1180745)
Supplement: nar_33_13_4212__1.pdf [file nar_33_13_4212__1.pdf]

Supplemental Material for Online Publication

for

**Cooperative Binding of DNA and CBF $\beta$   
to the Runt Domain of the CBF $\alpha$  Studied  
via MD simulations**

Bahru Habtemariam, Victor M. Anisimov and Alexander D. MacKerell, Jr.

Department of Pharmaceutical Sciences, School of Pharmacy

University of Maryland, Baltimore, MD 21201, USA

Table S1. Simulation systems.

| System              | Solute Atoms | Added Ions           | Total # of Atoms | Box Dimensions |
|---------------------|--------------|----------------------|------------------|----------------|
| CBF $\beta$ -RD-DNA | 4621         | 15(Na <sup>+</sup> ) | 34579            | 84x64x59       |
| RD-DNA              | 2581         | 13(Na <sup>+</sup> ) | 19754            | 79x57x48       |
| CBF $\beta$ -RD     | 3989         | 3(Cl <sup>+</sup> )  | 28700            | 81x67x58       |
| RD                  | 1949         | 5(Cl <sup>+</sup> )  | 18544            | 76x57x47       |
| CBF $\beta$         | 2040         | 2(Na <sup>+</sup> )  | 14072            | 65x52x46       |
| DNA1*               | 632          | 18(Na <sup>+</sup> ) | 7478             | 53x41x38       |
| DNA2*               | 632          | 18(Na <sup>+</sup> ) | 7478             | 53x41x38       |

\*Both DNA simulations used the same number of solvent atoms with the DNA1 simulation initiated from the experimental DNA-RD-CBF $\beta$  ternary complex structure and the DNA2 simulation initiated from the canonical B-form.

Table S2. RMS difference for backbone atoms of selected CBF $\beta$  residues in the vicinity of deleted residues 71 to 79 with respect to the crystallographic coordinates.

| Residue | RMS, Å    |
|---------|-----------|
| L66     | 0.97±0.10 |
| Q67     | 1.70±0.18 |
| F68     | 2.45±0.20 |
| F69     | 4.15±0.17 |
| P70     | 4.96±0.16 |
| T80     | 4.66±0.18 |
| P81     | 1.93±0.06 |
| S82     | 1.56±0.06 |
| R83     | 1.00±0.02 |
| E84     | 1.03±0.03 |

Table S3. RMS difference of MD simulated structures with X-ray structure 1H9D.

| Time, ps | DNA                                | RD              | CBF $\beta$     | RD-DNA          | RD-CBF $\beta$  | CBF $\beta$ -RD-DNA |
|----------|------------------------------------|-----------------|-----------------|-----------------|-----------------|---------------------|
| 1000     | 1.53                               | 4.10            | 2.04            | 2.46            | 3.05            | 2.58                |
| 1500     | 1.45                               | 3.81            | 2.26            | 2.71            | 3.48            | 2.56                |
| 2000     | 1.65                               | 3.28            | 2.30            | 2.97            | 4.00            | 2.76                |
| 2500     | 1.55                               | 3.31            | 2.18            | 3.63            | 4.12            | 2.85                |
| 3000     | 1.62                               | 3.74            | 1.99            | 3.09            | 3.79            | 2.88                |
| 3500     | 1.57                               | 3.34            | 2.00            | 3.21            | 3.67            | 2.89                |
| 4000     | 1.89                               | 3.74            | 2.18            | 3.54            | 3.31            | 2.98                |
| 4500     | 1.55                               | 3.40            | 2.21            | 3.84            | 3.66            | 2.92                |
| 5000     | 1.73                               | 3.28            | 2.24            | 3.65            | 3.59            | 2.83                |
| Average  | 1.62 $\pm$ 0.04<br>2.81 $\pm$ 0.05 | 3.56 $\pm$ 0.10 | 2.15 $\pm$ 0.04 | 3.23 $\pm$ 0.16 | 3.63 $\pm$ 0.11 |                     |

Table S4. Total Energy and Energy Components for the Systems Studied.

| System            | G <sup>a</sup> | G <sub>Solvation</sub> <sup>b</sup> | E <sub>strain</sub> <sup>c</sup> | E <sub>interaction energies</sub> |                             |                  | Entropy TS <sup>d</sup> |
|-------------------|----------------|-------------------------------------|----------------------------------|-----------------------------------|-----------------------------|------------------|-------------------------|
|                   |                |                                     |                                  | RD-DNA <sup>e</sup>               | RD-CBF $\beta$ <sup>f</sup> | CBF $\beta$ -DNA |                         |
| Trimer            | -              | -                                   | -                                | -2623 $\pm$ 13                    | -299 $\pm$ 10               | 45 $\pm$ 8       | 3424 $\pm$ 5            |
| RD-DNA            | 10683 $\pm$ 7  | 5675 $\pm$ 35                       | 2132 $\pm$ 32                    | -2513 $\pm$ 12                    |                             |                  | 1933 $\pm$ 3            |
| CBF $\beta$ -RD   | -5719 $\pm$ 6  | 3951 $\pm$ 22                       | 745 $\pm$ 15                     |                                   | -239 $\pm$ 3                |                  | 2972 $\pm$ 5            |
| RD                | -8118 $\pm$ 9  | 3561 $\pm$ 44                       | 4319 $\pm$ 51                    |                                   |                             |                  | 1477 $\pm$ 3            |
| CBF $\beta$       | -3159 $\pm$ 3  | 1897 $\pm$ 20                       | 1262 $\pm$ 18                    |                                   |                             |                  | 1544 $\pm$ 0            |
| DNA1 <sup>g</sup> | -4877 $\pm$ 4  | 1925 $\pm$ 19                       | 2952 $\pm$ 18                    |                                   |                             |                  | 505 $\pm$ 0             |
| DNA2 <sup>g</sup> | -2559 $\pm$ 1  | -4457 $\pm$ 4                       | 1898 $\pm$ 5                     |                                   |                             |                  |                         |
|                   | -2558 $\pm$ 1  | -4461 $\pm$ 4                       | 1903 $\pm$ 4                     |                                   |                             |                  |                         |

Energies in kcal/mol averaged over the MD simulations with standard errors reported.<sup>a</sup> Total free energy of each system based on equation 2 without entropy contribution;<sup>b</sup> Solvation energy of the system, including electrostatic and non-polar contributions;<sup>c</sup> Strain energy calculated as described in the methods;<sup>d</sup> TS calculated at 300 K.<sup>e</sup> Interaction energy between RD and DNA in the presence and absence of CBF $\beta$ ;<sup>f</sup> Interaction energy between RD and CBF $\beta$  in the presence and absence of DNA.<sup>g</sup> DNA1 and DNA2 represent the simulations initiated from the experimental DNA-RD-CBF $\beta$  ternary complex structure and from the canonical B form, respectively.

**Figure S1**

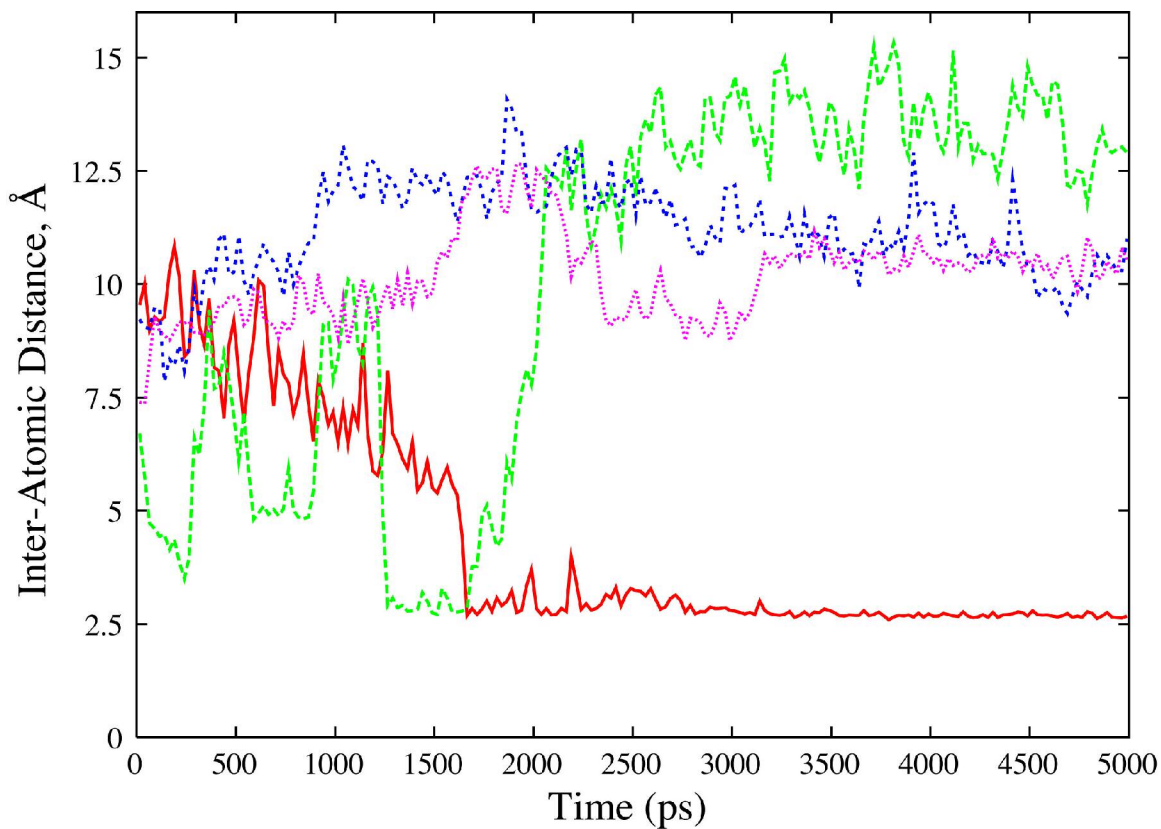

Distances, in Å, between RD Glu116 and CBFβ Arg33 atoms CA-CA and OE2-NH2 as a function of simulation time. Blue and cyan lines show distances for CA-CA atoms for the RD-CBFβ binary and ternary complexes, respectively, while green and red lines show OE2-NH2 distances for the RD-CBFβ binary and ternary complexes, respectively.
